# Supplementary material for: Asymmetric random walks reveal that the chemotaxis network modulates flagellar rotational bias in Helicobacter pylori
Source: eLife. 2021 Jan 25;10:e63936. doi: 10.7554/eLife.63936 (PMC7834020; doi:10.7554/eLife.63936)
Supplement: Figure 1—source data 1. [file elife-63936-fig1-data1.xlsx]

## Sheet: Fig. 1A
x (μm)	y (μm)
15.7933	28.055
18.0976	27.0541
22.2635	25.8359
24.9143	24.4065
28.1711	23.2662
32.2265	21.8457
34.1349	21.295
34.1033	21.2739
32.2389	21.7543
29.4018	22.2692
27.2746	22.9474
24.0743	22.6448
21.4972	22.006
19.2157	20.858
16.4231	19.6814
14.8976	17.7296
13.4903	16.361
12.2059	13.5833
11.918	11.5831
10.691	8.9254
10.312	6.43941
10.7265	6.5559
12.3998	10.1913
13.8772	13.5646
15.2144	16.231
17.5118	19.1407
21.1383	22.6223
23.872	26.4505
25.685	27.8064
27.8494	30.212
30.895	32.0943
33.4335	34.3204
34.3623	34.9315
32.4919	34.1582
30.8861	33.0744
28.8738	32.3368
26.6928	31.0374
25.2988	29.7447
23.7397	28.4826
22.1662	26.9368
19.5079	25.2623
17.6511	23.9571
15.5353	22.7766
17.8712	23.9995
20.9418	25.8263
23.3594	27.4587
25.6775	28.5923
28.2605	29.9775
31.637	31.2787
34.9667	33.1214
37.8053	34.2031
41.5406	34.017
45.7355	32.9169
48.6373	30.8701
51.6415	28.6649
54.4424	25.4422
55.6991	22.56
56.1624	20.595
56.1863	19.8849
55.4661	20.4193
55.5569	22.1928
54.933	24.5164
54.2216	27.7858
53.1105	29.9271
51.6285	32.2125
49.2809	33.958
47.1167	35.3523
45.1822	36.4449
43.3682	37.5538

## Sheet: Fig. 1B
∅(°)
137.267
158.322
137.586
13.4634
167.069
151.75
124.782
90.3243
115.324
137.013
51.3771
95.8245
126.2
169.466
149.822
125.799
117.95
179.363
174.208
172.359
15.0215
6.82485
146.479
136.93
122.242
138.983
167.424
159.271
162.932
25.2887
172.985
169.912
118.281
22.2345
87.6704
158.451
159.481
130.113
107.406
76.7606
68.76
47.0783
145.661
156.301
158.639
147.288
5.42975
102.031
119.666
159.585
157.662
41.1179
158.229
172.837
158.625
61.2547
137.945
174.981
152.666
160.302
177.51
174.626
178.782
169.161
174.285
169.232
176.358
154.633
178.067
132.831
164.105
170.917
135.583
164.456
115.379
175.2
112.437
103.639
177.921
150.88
125.506
83.4229
157.207
161.766
117.291
49.5893
173.471
176.205
146.496
164.105
138.977
167.301
163.932
170.525
119.059
173.732
17.7843
8.47406
70.5935
16.3138
9.7268
27.5296
172.13
157.798
39.7488
125.786
178.383
25.9414
163.996
156.011
130.773
161.217
172.695
132.675
166.201
97.2584
65.9378
136.842
155.314
171.016
70.8548
11.7334
178.371
137.289
175.562
137.515
179.254
164.826
171.507
165.526
170.986
137.398
179.533
159.225
167.114
178.046
134.899
121.958
170.745
134.752
170.469
169.098
144.875
177.422
110.516
156.276
134.951
165.743
132.169
178.064
172.347
150.884
176.808
178.65
126.938
171.101
168.585
176.93
174.7
130.833
150.01
110.006
146.221
118.845
177.356
176.308
164.024
166.115
156.426
172.856
171.234
175.177
103.306
157.231
113.077
167.133
143.255
164.868
168.511
141.682
141.538
132.756
177.377
156.817
170.463
172.896
177.123
165.037
179.701
136.438
175.923
113.509
165.207
112.675
148.366
158.047
177.006
175.171
128.267
179.154
165.953
110.535
169.987
171.028
171.385
179.911
175.271
165.206
162.373
169.705
172.938
176.03
160.001
120.464
155.907
131.551
133.085
163.71
177.414
134.186
170.098
168.226
172.782
156.718
171.714
134.821
119.549
179.942
83.0161
90.5389
155.246
118.301
171.958
74.8096
74.552
155.954
145.314
174.59
178.132
173.206
144.493
170.712
170.55
152.772
7.84213
169.222
142.927
156.463
174.361
153.302
170.539
140.591
175.539
144.983
158.524
164.771
167.776
176.504
162.209
175.977
161.796
132.464
132.243
169.687
169.52
111.446
162.118
110.515
123.062
130.961
169.24
138.392
132.767
156.925
151.434
138.193
158.555
136.304
139.391
125.051
130.646
116.094
136.577
175.67
122.884
114.635
159.369
174.709
110.992
152.467
167.865
124.757
171.619
179.813
174.375
142.142
139.707
155.251
167.508
171.198
168.562
170.017
90.9658
97.7876
172.135
152.879
138.868
173.687
118.766
146.594
179.148
171.347
160.81
159.956
175.395
74.2914
175.284
152.068
155.084
177.662
172.291
125.123
149.11
142.184
91.8396
147.973
154.591
125.158
164.701
155.898
155.025
159.419
178.286
139.838
175.374
118.847
155.391
127.965
138.243
137.016
176.607
153.554
164.863
159.707
163.755
166.712
176.005
163.826
167.787
170.747
167.239
173.488
167.047
177.521
175.729
167.016
169.246
173.828
161.277
106.612
175.281
167.164
153.976
158.86
130.958
154.538
150.219
137.249
176.428
167.491
174.584
154.965
176.48
178.87
146.713
163.232
150.888
174.876
167.623
135.788
171.938
170.516
168.09
179.841
113.086
148.351
161.558
161.192
159.534
174.165
163.763
157.655
169.27
170.152
175.907
170.122
162.347
167.366
113.617
148.782
157.268
160.336
176.367
160.542
106.441
124.204
167.868
140.833
162.517
160.864
127.442
148.898
112.455
166.265
171.683
142.577
148.148
170.123
122.356
65.6429
148.124
165.728
169.447
120.509
171.454
126.054
154.69
141.317
126.243
176.925
134.392
168.215
136.475
161.806
174.862
152.199
65.591
176.743
133.247
100.296
166.251
177.355
84.2853
171.594
168.879
162.663
167.735
174.196
173.614
158.658
151.363
179.967
167.403
149.459
127.682
125.002
65.1907
141.675
112.845
126.216
165.413
153.98
123.417
113.129
103.387
178.123
136.798
157.542
164.52
132.574
110.117
82.9391
163.278
135.698
172.24
149.565
124.048
153.167
95.3004
152.323
118.38
146.224
150.399
131.382
134.049
173.709
177.661
164.925
123.181
172.41
158.728
168.793
138.985
103.665
130.567
178.1
98.9652
176.962
145.712
161.296
175.564
169.908
158.734
143.428
146.359
139.646
130.993
170.776
141.363
101.057
116.117
178.043
167.056
153.637
128.278
170.413
127.604
153.076
170.728
173.103
154.07
117.532
106.196
70.4301
127.792
138.102
165.841
155.042
173.088
157.417
149.854
72.4184
120.71
114.358
176.935
146.036
165.912
170.626
170.965
126.909
171.698
150.907
175.38
175.346
112.22
145.687
151.211
129.531
174.773
155.209
148.229
172.868
118.588
158.656
95.1471
162.528
175.248
177.969
170.124
155.015
158.527
60.2676
158.664
177.589
131.478
155.512
162.283
167.58
132.619
171.844
120.179
171.158
161.795
131.634
87.7215
80.8463
74.9546
167.338
116.374
131.036
143.09
161.75
145.232
107.206
172.404
168.276
134.532
116.208
179.396
161.505
158.434
133.342
144.203
115.506
177.684
112.066
140.023
104.02
170.974
157.715
102.473
112.345
179.812
157.479
178.834
102.659
119.289
155.68
83.9117
174.773
100.038
146.035
131.838
118.713
135.3
141.163
124.255
168.441
119.767
169.666
139.852
176.582
117.973
131.818
171.149
145.294
173.44
173.457
161.538
112.174
168.054
174.595
154.133
163.582
167.889
159.806
124.516
177.546
152.153
117.035
152.405
162.764
119.747
140.286
136.584
143.055
161.569
119.163
76.0617
159.235
158.491
144.916
149.59
159.937
147.333
175.394
116.166
135.909
124.234
152.852
174.451
163.537
168.672
173.005
135.193
138.718
147.453
117.204
117.967
156.989
134.351
131.211
140.913
177.312
127.647
115.5
130.667
127.322
115.79
160.68
137.289
178.188
141.309
148.723
174.389
113.148
111.022
125.358
124.362
134.484
126.032
174.498
126.113
117.204
120.977
123.391
111.669
162.729
148.823
132.584
136.786
156.065
126.325
165.638
165.694
151.532
115.674
148.124
151.287
153.601
148.424
178.657
143.444
130.932
163.167
170.779
146.311
173.895
173.306
136.273
177.405
164.179
160.687
132.766
156.116
162.128
134.485
178.459
151.335
169.576
133.239
133.519
119.264
160.599
168.777
136.984
137.27
133.37
139.455
121.941
154.382
160.885
115.586
155.894
159.225
171.899
117.52
179.173
148.927
118.51
153.616
176.806
110.628
162.841
88.8356
122.84
125.687
128.675
133.375
121.907
123.49
141.015
66.8059
167.695
112.968
138.538
130.851
176.956
83.412
164.09
151.287
162.112
108.69
128.685
131.483
167.689
124.113
99.8437
162.642
140.649
178.748
148.138
168.302
152.462
113.708
147.097
171.313
153.003
168.093
87.6809
166.086
179.171
176.321
178.465
117.906
161.78
175.533
95.4488
113.572
170.27
85.8289
179.253
174.758
174.576
166.447
145.001
157.509
109.26
171.047
167.332
78.3863
177.747
170.287
156.675
139.29
147.447
165.897
178.525
75.2667
136.043
129.478
154.424
132.65
137.291
168.778
151.316
162.665
145.517
166.441
167.133
157.542
161.573
168.421
179.671
171.738
129.403
169.702
171.666
134.804
92.3713
177.954
127.546
157.205
148.457
176.529
146.186
177.033
142.884
175.768
173.111
171.812
119.957
134.763
90.6327
176.042
177.837
155.548
138.173
160.826
163.26
125.64
1.80172
169.922
174.878
162.106
124.76
146.752
179.985
157.518
178.077
173.304
169.958
151.684
121.683
143.601
80.1555
109.754
143.109
172.07
134.448
122.746
170.417
168.005
135.008
108.122
138.202
126.536
154.492
96.9115
130.826
175.739
172.159
130.887
159.23
159.236
134.8
170.21
165.31
179.849
170.327
168.642
89.8582
92.7607
128.311
171.08
170.185
148.833
178.285
131.307
153.69
175.845
157.964
116.642
105.005
162.497
172.942
154.939
174.869
161.424
117.957
136.181
120.81
165.733
123.374
147.234
172.61
139.609
161.09
97.3916
143.97
141.741
20.7804
77.0473
118.487
155.952
168.623
152.953
156.763
130.169
65.1761
88.6537
97.8941
132.412
166.628
156.33
122.195
170.195
170.608
165.192
66.4561
129.45
151.345
142.395
151.726
151.673
164.25
176.414
179.698
166.649
162.939
168.957
172.106
141.044
114.529
93.8097
84.7684
158.899
152.901
117.754
175.35
164.192
123.726
89.0148
76.2846
158.357
176.76
149.229
120.718
166.84
128.701
136.257
111.931
151.512
126.062
166.81
76.3499
146.03
166.837
179.838
164.504
179.371
172.562
172.473
158.831
167.678
164.994
175.037
170.393
168.323
159.838
163.707
160.728
158.134
178.053
146.309
153.897
97.7892
148.468
135.511
130.441
174.888
171.171
178.608
169.547
147.77
165.703
175.038
173.769
174.792
64.8337
129.654
176.422
134.34
158.938
168.172
166.942
150.282
161.163
107.554
149.341
120.213
167.184
133.553
178.444
168.323
95.9797
130.13
162.635
80.1388
107.189
175.825
112.852
155.046
168.894
168.021
162.156
133.991
170.532
141.778
170.768
134.411
126.581
137.997
148.608
177.024
151.435
172.104
167.597
176.396
161.51
175.739
168.626
177.105
113.923
135.163
155.462
128.238
109.752
177.9
169.525
165.251
171.86
170.558
178.62
152.645
106.79
106.192
158.747
161.444
172.322
162.302
179.469
168.135
105.501
147.789
139.826
177.804
170.641
130.113
176.028
130.437
166.047
174.883
66.1767
147.482
153.25
171.456
118.026
117.745
164.781
158.93
175.849
143.144
141.057
157.576
164.408
114.314
112.015
176.914
148.773
171.747
153.498
154.506
174.352
175.936
154.506
166.255
106.214
163.418
112.858
141.355
160.225
177.086
164.245
173.583
173.595
144.736
164.955
156.067
112.585
172.446
134.506
166.859
146.214
176.067
91.361
173.289
86.7535
165.217
109.497
157.069
159.95
120.771
167.13
118.548
172.226
174.066
167.902
175.446
132.347
162.005
129.509
151.514
145.582
126.934
175.475
87.0719
170.411
122.443
86.8977
124.444
138.108
165.052
160.416
169.241
47.8558
24.0873
154.946
161.048
163.759
165.18
169.379
126.989
85.0269
133.193
148.312
169.435
135.285
151.168
159.836
154.25
125.273
157.36
136.797
155.014
147.706
154.05
152.974
174.424
144.236
145.665
152.544
161.776
113.76
171.639
178.623
160.095
174.399
174.333
176.386
115.82
167.724
165.122
157.388
113.141
173.947
175.009
56.6731
143.42
153.449
144.093
169.322
170.705
153.506
153.92
114.677
150.869
87.5757
173.72
162.092
177.222
167.098
155.872
146.97
30.8581
162.346
165.18
168.214
118.947
163.276
98.3565
172.001
140.4
168.467
129.98
127.221
176.13
108.388
139.855
143.833
155.028
153.358
178.514
150.229
170.239
153.686
156.972
114.218
174.463
156.467
173.076
144.061
179.486
160.683
171.282
171.871
165.534
155.607
108.073
159.096
163.597
136.395
98.2644
125.191
157.968
158.451
155.988
167.969
177.417
117.169
152.13
166.759
139.202
169.684
129.358
141.253
167.753
165.583
126.984
118.642
156.234
90.2842
152.363
162.91
41.5004
88.4375
131.826
123.875
141.435
104.318
171.477
131.384
157.98
159.757
177.207
173.873
139.624
173.242
163.235
152.571
168.512
159.727
120.826
157.68
167.015
163.824
111.909
160.404
142.348
144.531
111.153
110.835
78.0361
65.5902
171.367
143.655
52.452
173.467
163.328
147.111
166.793
176.956
130.876
169.641
175.175
173.71
144.939
168.979
170.143
171
178.399
165.313
98.4524
166.168
171.652
173.274
107.844
176.852
169.883
176.792
178.147
157.162
78.0531
178.015
179.143
164.589
169.254
91.858
130.083
128.467
164.07
135.693
179.058
170.921
146.1
74.9115
119.69
175.026
170.579
139.553
167.681
126.526
156.506
174.241
166.785
179.086
164.578
132.326
148.699
110.109
162.924
176.015
177.058
174.294
121.272
138.507
179.635
168.434
173.213
174.428
149.353
169.526
173.483
169.159
141.981
177.641
164.406
84.4222
174.966
67.09
160.644
168.01
159.031
129.979
162.546
164.403
115.707
158.567
103.883
162.631
141.867
155.193
152.746
179.235
154.119
158.542
168.639
128.202
164.489
157.396
145.656
125.23
176.519
166.267
174.131
149.325
171.536
178.293
167.199
134.375
166.717
137.683
113.897
134.354
179.34
168.971
172.431
81.2467
179.671
172.305
159.776
140.633
134.484
128.467
158.749
158.12
150.737
156.005
135.136
178.468
176.108
146.541
117.436
172.403
114.555
175.767
121.566
138.948
144.351
171.125
156.578
159.828
171.05
145.455
175.041
127.503
132.01
153.938
134.033
156.251
64.3391
101.046
152.529
76.7944
93.1992
149.837
178.436
140.862
152.169
126.695
136.115
132.274
114.238
177.597
108.914
172.785
105.064
168.438
162.592
83.6949
123.95
170.56
165.095
160.56
175.576
121.735
160.765
175.412
103.798
169.393
148.916
114.322
173.989
122.37
133.826
167.305
172.205
161.109
172.683
131.124
167.196
176.619
125.228
164.946
176.597
163.223
168.973
155.296
156.701
176.163
167.457
161.921
176.625
178.132
165.364
144.284
172.918
156.006
172.65
166.935
159.008
167.899
112.327
168.267
101.883
165.162
97.4571
170.812
168.016
135.672
136.613
111.646
179.269
101.865
174.705
135.279
160.643
117.365
179.551
107.085
179.619
175.252
146.376
169.794
115.095
151.834
154.646
172.405
153.997
128.477
144.253
139.782
169.11
165.87
170.166
122.962
142.838
146.037
129.986
155.066
135.997
111.302
163.751
148.96
159.957
179.349
118.526
147.517
152.181
171.428
170.744
179.619
168.945
157.007
137.721
164.558
152.582
160.908
162.876
169.186
176.435
152.645
93.6145
153.812
177.12
102.469
168.812
156.022
136.792
172.262
179.044
141.193
148.661
176.647
152.49
168.615
168.998
69.9367
119.724
116.071
156.791
169.77
76.0959
161.241
128.356
176.167
171.964
144.406
176.248
161.455
151.278
159.146
168.081
172.129
145.14
150.509
175.171
165.903
175.786
150.122
112.271
108.401
160.727
173.099
112.001
159.597
169.351
139.934
169.03
168.807
167.623
67.2578
148.838
174.361
154.565
169.978
117.939
174.748
160.322
137.877
163.42
167.071
178.684
163.885
166.832
163.935
171.27
173.679
177.433
157.264
160.827
171.209
156.36

## Sheet: Fig. 1C
Time (sec)	Swimming speed (μm/s)
0.0222222	70.1003
0.0444444	75.8976
0.0666667	77.5914
0.0888889	78.1359
0.111111	76.1926
0.133333	61.9964
0.155556	14.8246
0.177778	47.5624
0.2	55.6393
0.222222	56.3956
0.244444	48.9122
0.266667	52.9761
0.288889	54.0885
0.311111	51.2272
0.333333	54.2926
0.355556	53.1516
0.377778	54.712
0.4	53.4711
0.422222	56.4834
0.444444	59.1278
0.466667	34.5539
0.488889	71.408
0.511111	79.3304
0.533333	85.3479
0.555556	73.8537
0.577778	81.3548
0.6	80.0244
0.622222	74.0009
0.644444	84.5203
0.666667	69.4956
0.688889	69.9185
0.711111	41.9042
0.733333	44.6891
0.755556	48.1436
0.777778	47.0992
0.8	49.8841
0.822222	49.9814
0.844444	51.0556
0.866667	50.9607
0.888889	51.2166
0.911111	58.8824
0.933333	53.3026
0.955556	66.3234
0.977778	67.1199
1	67.4079
1.02222	73.0124
1.04444	70.8266
1.06667	73.1411
1.08889	70.3775
1.11111	70.7695
1.13333	72.3422
1.15556	71.0587
1.17778	66.8784
1.2	62.5238
1.22222	76.893
1.24444	73.2999
1.26667	60.5945
1.28889	25.6766
1.31111	23.5988
1.33333	48.9924
1.35556	55.3753
1.37778	56.3344
1.4	49.7068
1.42222	52.4375
1.44444	58.4566
1.46667	57.2711
1.48889	55.989
1.51111	48.5479

## Sheet: Fig. 1D
Segment	Swimming speed (μm/s)	Standard deviation
1	62.8449	6.2438
2	47.5243	10.8144
3	65.0548	16.0654
4	45.9287	3.8105
5	62.838	11.7336
6	46.0645	10.1704

## Sheet: Fig. 1E
fast_speeds (μm/s)	slow_speeds (μm/s)
109.374	54.5774
69.7389	36.0712
57.0308	39.646
83.2398	25.1724
51.6845	44.111
63.8481	36.7175
62.3023	31.0748
63.1529	55.7415
47.1634	32.6292
103.119	37.6113
63.7939	47.8903
58.2406	32.9163
53.8167	35.9907
53.6525	67.8515
69.5871	42.9758
77.3907	52.2554
56.8875	36.4392
75.4829	35.9409
61.2524	44.2579
43.8771	48.2805
55.4041	29.7632
48.5625	48.1611
55.8589	28.0091
54.0347	34.6073
52.1724	35.4402
65.93	24.484
44.2251	17.4113
47.6592	25.8684
50.182	29.3732
55.9203	42.4639
48.8517	32.2448
81.3227	54.987
63.0651	26.0708
68.5106	42.9574
67.9181	55.3191
73.6399	37.9807
49.6517	24.9749
70.3009	43.8985
52.7707	30.8857
62.7505	45.9152
51.9663	22.7926
78.3157	30.105
55.9982	20.4407
35.2925	21.9736
75.7605	49.5018
59.3195	31.4402
60.6722	29.902
57.408	36.5959
45.1874	33.5644
42.4551	37.1833
55.2349	18.2648
52.726	46.949
63.2743	48.6313
51.4455	28.726
45.6411	32.8828
62.2697	45.3301
46.3366	34.84
89.8649	22.7399
59.3753	16.7515
92.7449	53.2529
51.5054	29.9402
82.5022	61.6709
64.0173	25.3383
45.8215	11.7129
50.2084	59.8934
68.7464	44.8084
37.4396	19.4971
62.4564	54.5124
43.8965	30.5972
64.5854	25.047
68.6518	49.1567
45.5529	16.5643
50.5931	47.0719
41.9689	53.9935
62.8203	30.9875
59.6079	29.4103
58.27	49.3634
65.8159	39.5176
34.0487	25.5289
66.8209	56.4365
70.054	44.1584
41.9441	28.7615
71.8291	43.6384
63.5509	49.1951
43.3193	31.1511
49.8709	22.8459
64.1021	30.8158
56.3824	41.727
68.618	46.8843
66.7628	56.8468
61.8207	55.2292
46.5503	14.933
60.5083	35.2312
67.268	39.4027
47.7221	33.4519
45.0698	39.1469
48.4002	38.2786
66.5045	39.9036
55.1766	29.3931
49.8478	51.9701
48.8261	31.9968
47.9424	42.5885
63.2579	37.2797
55.0443	27.9186
75.3258	56.4701
64.3267	36.6706
56.1108	19.5748
59.2389	31.3619
74.6606	43.1343
46.5234	25.6227
52.4506	43.0799
52.9505	30.5807
86.2399	38.7278
88.5941	55.4862
99.8926	37.5023
66.7635	36.3847
53.1157	42.5447
91.0276	46.9679
64.5952	36.0705
70.1649	48.1135
61.2892	42.793
71.5083	44.9093
58.5072	48.4621
99.2132	58.2464
62.3158	43.3932
90.0601	65.0126
81.3444	30.2659
60.9964	49.405
86.6147	52.61
68.2991	38.9302
53.0961	29.8362
59.0487	41.7893
44.4232	49.8052
70.2866	49.4097
66.0422	42.7673
67.4256	49.6014
60.8935	43.7251
67.8977	45.8075
59.1191	46.2649
66.2335	48.86
61.4221	33.5103
67.0203	31.5577
87.473	56.1376
41.5859	36.3681
75.9863	41.0152
63.2351	42.8405
48.1566	13.6876
61.2117	29.5463
32.8256	41.1767
50.4685	30.1085
39.4128	51.9509
44.6822	35.6055
31.1958	32.6252
86.4143	58.5246
53.5067	29.1973
29.6382	17.1338
44.8203	25.9363
44.2652	28.5134
56.0745	44.0372
52.5615	41.9548
46.1498	16.105
45.9081	27.0845
62.4198	15.8399
57.3704	41.9888
61.8099	33.8348
57.0044	27.2446
41.5034	20.957
47.6683	30.9066
61.8937	42.5408
41.9873	40.5241
68.1531	48.2173
47.4462	41.5345
84.1777	36.9948
45.5068	28.8551
82.8524	34.3816
63.777	32.5039
61.0958	47.5466
60.0616	39.0489
67.7193	27.328
68.0108	28.414
33.9141	22.4109
68.6451	39.3391
31.9153	26.779
42.8645	27.4093
74.956	35.0078
62.2783	53.1603
58.8903	34.6552
43.2852	39.1387
47.2288	32.8697
63.0578	60.4942
56.2566	39.3818
55.7196	26.6943
48.6673	26.3817
57.7125	51.1841
46.7495	24.7323
52.2698	26.2111
53.8717	22.5097
67.148	34.3431
45.5731	42.0516
29.4159	23.6648
41.627	31.3489
34.5574	28.1412
51.7638	30.2187
41.8787	22.5175
50.5421	36.0544
35.7852	26.2711
31.0205	23.1316
47.563	25.3241
61.2088	37.1678
49.9048	31.2574
45.1868	25.8403
34.7377	22.2089
40.6462	28.9152
41.8435	10.5086
33.2514	12.2482
56.2639	35.9958
57.0778	35.7382
29.0454	27.3096
46.9545	38.661
44.663	7.84773
43.1722	18.9794
37.3201	31.1518
40.703	24.0085
25.5265	16.2729
37.8611	18.1419
38.166	16.8252
43.3991	28.4773
33.2981	15.0368
45.9225	33.303
54.2291	23.3853
28.8162	19.4671
56.0667	25.4627
31.7752	14.0809
25.2481	16.6638
35.7583	29.1044
43.3466	31.7599
39.0633	23.5987
50.4274	42.8668
45.5472	18.1461
46.0738	29.0008
37.6384	25.083
50.4939	23.4171
29.7136	22.2638
39.9136	24.1282
42.8602	27.5111
43.1039	23.0979
20.908	20.4468
43.1905	29.0399
29.9902	27.0493
43.6291	35.3726
