# Supplementary material for: Asymmetric random walks reveal that the chemotaxis network modulates flagellar rotational bias in Helicobacter pylori
Source: eLife. 2021 Jan 25;10:e63936. doi: 10.7554/eLife.63936 (PMC7834020; doi:10.7554/eLife.63936)
Supplement: Figure 2—source data 1. [file elife-63936-fig2-data1.xlsx]

## Sheet: Fig. 2B Sample 1
t (s)	x (mm)	y (mm)
0.0222	12.6805	2.5
0.0444	12.7432	2.5261
0.0667	13.9511	2.7018
0.0889	14.5157	2.791
0.1111	15.2914	3.1088
0.1333	15.7983	3.8022
0.1556	16.0558	4.007
0.1778	16.1004	4.2289
0.2	14.7975	3.8839
0.2222	13.6589	3.5654
0.2444	12.1865	3.0663
0.2667	11.042	2.8257
0.2889	9.4225	3.1011
0.3111	7.5137	4.4259
0.3333	6.3125	5.0941
0.3556	4.7011	6.427
0.3778	3.1079	7.8671
0.4	2.5	8.9733
0.4222	3.0171	8.3946

## Sheet: Fig. 2B Sample 2
t (s)	x (mm)	y (mm)
0.0222	16.1505	2.6788
0.0444	14.3944	1.9365
0.0667	12.2175	1.6936
0.0889	9.7976	1.8191
0.1111	7.8399	1.5672
0.1333	5.8423	1.6185
0.1556	5	1.6331
0.1778	6.3056	1.4677
0.2	7.9366	1.3976
0.2222	8.9309	1.1769
0.2444	10.4005	1
0.2667	11.9685	1.2302
0.2889	13.4089	1.9388
0.3111	14.6505	2.4225
0.3333	15.5508	3.1663
0.3556	16.7611	4.0235

## Sheet: Fig. 2B Sample 3
t (s)	x (mm)	y (mm)
0.0222	2.5	7.1917
0.0444	2.8683	6.657
0.0667	3.2989	5.5703
0.0889	3.0829	5.2452
0.1111	3.3579	4.9606
0.1333	3.4003	4.6542
0.1556	3.605	4.4643
0.1778	4.0827	3.8537
0.2	4.7086	3.8426
0.2222	5.0906	2.9957
0.2444	5.1787	2.5
0.2667	4.6217	4.1731
0.2889	4.4507	5.9693
0.3111	4.2773	6.9875
0.3333	5.1535	7.7123
0.3556	6.2537	8.657
0.3778	7.7382	9.8449
0.4	9.177	9.8813
0.4222	10.2793	9.2535
0.4444	11.0202	8.8195
0.4667	12.073	7.2461
0.4889	12.0426	6.2417
0.5111	11.5795	4.4194

## Sheet: Fig. 2B Sample 4
t (s)	x (mm)	y (mm)
0.0222	2.5	4.6761
0.0444	3.2843	6.3776
0.0667	5.4081	7.6304
0.0889	7.4877	7.8527
0.1111	7.9382	8.0166
0.1333	7.6798	8.193
0.1556	7.25	8.3312
0.1778	6.3176	7.2949
0.2	5.3214	6.2066
0.2222	5.0223	5.448
0.2444	4.6036	4.2239
0.2667	4.3828	3.3681
0.2889	4.3884	2.5

## Sheet: Fig. 2C
pusher_speeds (μm/s)	puller_speeds (μm/s)
68.1121	32.925
52.3707	33.7362
50.9073	24.0766
63.379	34.6933
60.6185	53.4595
59.0229	41.4526
59.2056	45.9871
57.3357	22.807
74.1292	58.227
69.6524	19.1572
71.925	34.4426
58.8077	33.8098
46.7725	38.6641
47.7902	34.3713
56.8451	26.4317
52.5104	44.5396
44.6432	32.0662
63.1948	17.0514
42.8422	9.88603
46.6696	22.7247
62.9663	34.5889
48.0047	32.3673
43.9655	36.7741
28.5484	8.6621
45.1292	16.0184
42.9832	21.9986
49.4717	16.1755
66.6742	27.4803
42.3115	15.624
44.3333	26.0498
40.8868	14.3591
35.5268	29.5787
44.5948	35.4782
48.5922	23.7593
33.7448	31.0505
80.9466	47.5166
51.6641	37.6595
48.4317	32.6581
29.4518	22.5234
60.8992	19.5482
54.6164	45.6614
37.6924	16.5938
73.9182	58.3354
43.2383	23.3336
64.0226	41.0262
46.3932	14.6308
51.2244	49.7042
52.1461	38.5744
59.0834	24.3056
56.5394	45.0615
22.6304	19.5416
68.2248	47.5643
42.3465	21.5849
69.4276	37.5197
60.8962	37.9159
52.9977	19.9477
58.2491	38.3642
54.7296	47.4554
50.3498	11.9953
68.446	31.4926
62.9753	37.7247
81.2657	25.8711
42.5481	25.2751
49.8774	34.4066
64.885	21.2675
65.6799	25.1401
39.7685	26.2933
75.853	33.7105
60.8754	49.4935
42.2962	33.8154
61.391	41.864
53.3523	19.0661
47.4074	18.9842
55.7467	49.3441
51.2466	22.961
51.675	19.662
64.6058	30.9986
68.6912	30.2093
64.8974	29.0477
72.5658	50.7258
69.1929	42.0775
60.1133	45.8591
61.8592	32.5396
93.5051	63.7628
56.0708	52.0161
75.3447	33.5803
62.7211	16.6798
62.164	35.511
49.7731	42.2098
67.8916	37.9198
79.3303	47.7217
66.245	43.1741
61.0577	42.7502
63.089	44.4743
64.0262	30.6232
75.4412	59.7378
38.9495	17.3776
43.1602	30.8294
46.4814	27.075
42.6797	19.446
37.8243	26.9731
37.8174	6.26443
37.0322	19.3061
40.874	25.5488
35.5737	18.8753
34.1508	15.5824
42.1001	12.7982
39.2385	19.9273
41.324	29.7513
36.047	26.9985
35.5262	33.4369
38.5081	23.0279
46.0359	18.8871
33.9454	9.90802
32.7526	28.6677
47.6226	30.2052
