# Supplementary material for: Asymmetric random walks reveal that the chemotaxis network modulates flagellar rotational bias in Helicobacter pylori
Source: eLife. 2021 Jan 25;10:e63936. doi: 10.7554/eLife.63936 (PMC7834020; doi:10.7554/eLife.63936)
Supplement: Figure 3—source data 1. [file elife-63936-fig3-data1.xlsx]

## Sheet: Fig. 3A
Single cell CWbias
0.111481
0.265165
1
0.465934
0.257143
0.815498
0.300733
0.465
0.450928
0.381579
0.13783
0.338608
0.413043
0
0.375
0.356436
0
0.216312
0.46595
0.485612
0.143382
0.486891
0.496269
0.4
0.368821
0.468165
0.269531
0.473282
0.176471
0.39759
0.522088
0.574194
0.338912
0
0.058296
0.445161
0.273543
0.357798
0.383562
0
0.21327
0.465753
0.392857
0
0.628571
0.492891
0.557018
0.230769
0.321951
0.432692
0.111111
0.356021
0.409091
0.11413
0.275676
0.294444
0.569832
0.336207
0.350427
0.293413
0.0310559
0.025
0.28481
0.277108
0.638889
0.790123
0.527778
0
0.188679
0.45
0.396341
0.0201342
0
0.394495
0.448598
0.270968
0.33
0.24183
0.216216
0.342105
0.0824742
0
0.287671
0.474747
0.336538
0.388889
0.346667
0.383562
0.0451128
0.111111
0.252747
0.478261
0.47191
0.303704
0.518248
0.136364
0.515152
0.366412
0.4
0.343511
0.853659
0.596774
0.472441
0.362205
0.507937
0.123967
0.353659
0.432203
0.569106
0.395062
0.302521
0.300813
0.35443
0.594937
0.263158
0.292035
0.202703
0.155963
0.366972
0.445946
0.543689
0.382609
0.163462
0.226415
0
0
0.41791
0.405941
0.398058
0.217391
0
0.112245
0.326923
0.20202
0.336634
0.177083
0.267327
0.402778
0
0
0.241379
0.303371
0.235955
0.204301
0.181818
0.511111
0.458824
0.349398
0.634146
0
0.0740741
0.364706
0.348837
0.444444
0.6375
0.567901
0.487805
0.351852
0
0.296296
0.309091
0.584906
0.215686
0.392157
0.588235
0.310811
0
0.305556
0.461538
0.114286
0.3
0.8
0.315068
0.289855
0.755556
0.375
0
0.217391
0.220588
0.253731
0.418605
0
0.212121
0.396825
0.2
0.650794
0.365079
0.177419
0.477273
0
0.634146
0.467742
0.435484
0.488372
0.404762
0.442623
0.508197
0.40678
0
0.225
1
0.135593
0.512195
0.25641
0.355932
0.473684
0.160714
0.142857
0.413793
0.0909091
0.490909
0
0.545455
0.685185
0.218182
0.513514
0.243243
0.388889
0.714286
0
0
0.666667
0.345455
0.519231
0.137255
0.62
0.56
0
0.12
0.69697
0.122449
0
0.313725
0.53125
0.104167
0.333333
0.808511
0
0.282609
0.340426

## Sheet: Fig. 3B
x (μm)	y (μm)		x (μm)	y (μm)		x (μm)	y (μm)		x (μm)	y (μm)		x (μm)	y (μm)		x (μm)	y (μm)		x (μm)	y (μm)		x (μm)	y (μm)		x (μm)	y (μm)		x (μm)	y (μm)		x (μm)	y (μm)		x (μm)	y (μm)		x (μm)	y (μm)
144.8	180.72		38.799	58.458		41.531	117.78		150.19	231.06		12.26	195.25		115.91	175.67		196.43	84.924		40	11.141		73.769	60		122.54	13.182		237.93	134.68		224.25	209.09		61.2	168.84
144.27	182.69		39.204	58.428		42.018	117.11		150.43	229.62		13.303	195.04		115.33	175.83		197.37	85.632		40.01	11.77		73.709	60.45		122.36	13.853		236.98	134.23		223.85	208.99		60.54	168.81
143.84	184.37		39.491	58.428		42.628	116.41		150.99	228.63		13.481	195.22		113.63	176.82		198.43	86.353		40.11	12.202		73.774	60.96		122.42	14.743		236.06	134		223.75	208.86		59.89	168.76
143.93	185.63		39.703	58.411		43.106	115.83		151.4	227.72		15.05	194.93		112.95	177.15		199.43	86.997		40.1	12.924		73.683	61.78		121.9	15.416		235.15	133.59		223.12	208.83		59.17	168.59
144.38	187.13		40.029	58.353		43.651	114.99		151.86	226.71		15.9	194.68		112.05	177.63		200.74	87.654		40.24	13.437		73.477	62.45		121.97	15.514		234.5	133.14		223.12	208.31		58.5	168.63
144.95	188.3		40.471	58.252		44.069	114.22		152.14	225.78		16.37	194.56		111.2	178.77		201.85	88.481		40.44	14.367		73.306	62.95		121.86	16.501		234.11	132.39		223.45	208.26		57.87	168.61
146	189.58		40.841	58.219		44.374	113.41		152.08	224.7		17.011	194.54		110.53	179.87		202.76	89.308		40.77	15.087		73.221	63.75		121.89	17.372		233.3	131.97		222.78	208.05		57.21	168.73
147.12	190.79		41.261	58.147		44.57	112.63		151.61	223.61		18.741	193.81		110	181.04		203.51	90.205		41.12	15.897		73.118	64.19		121.42	18.039		232.57	131.42		222.54	207.72		56.56	169.01
148.16	192.01		41.546	57.88		44.695	111.73		151.13	222.54		19.076	193.9		110.03	182.15		204.37	91.335		41.53	16.765		73.128	64.63		121.19	19.357		231.61	131		222.26	207.61		56.04	169.02
149.47	192.93		41.863	57.607		44.712	110.66		150.48	221.46		19.648	193.69		110.24	183.25		205.55	92.743		41.84	17.286		73.139	64.97		121.2	19.859		231.04	130.34		221.96	207.73		55.5	169.12
150.68	193.82		42.222	57.435		44.845	109.91		149.82	220.68		20.158	193.52		110.55	184.25		206.97	93.88		42.29	17.875		72.918	65.73		121.17	20.493		230.67	129.89		221.8	207.34		54.81	169.53
151.82	194.47		42.596	57.397		44.795	108.96		148.98	219.94		20.511	193.54		110.9	185.37		208.28	94.56		42.76	18.438		72.608	66.42		120.92	21.001		230.3	129.5		221.11	207.02		54.13	169.95
152.78	195.03		42.83	57.036		44.594	108.01		148.06	219.24		20.975	193.65		111.46	186.39		209.72	94.99		43.1	19.058		72.616	67.22		120.86	21.416		229.72	129.03		220.86	206.73		53.24	170.49
153.78	195.62		43.283	56.783		44.658	107.01		147.07	218.57		21.612	193.42		112.17	187.09		211.83	94.996		43.24	19.472		72.427	67.91		120.75	22.2		229.1	128.63		220.82	206.5		52.75	171.01
154.89	196.11		43.447	56.823		44.739	106.02		145.95	217.93		23.366	192.39		112.97	187.83		213.75	94.603		43.44	20.076		72.339	68.7		120.54	22.856		228.36	128.28		220.17	206.11		52.29	171.52
156.29	196.5		44.112	56.448		44.443	105.01		144.76	217.33		23.66	192.35		113.75	188.61		215.34	93.84		43.75	20.602		72.244	69.61		120.54	23.348		227.64	128.01		219.74	205.58		51.8	172.13
157.87	196.24		44.464	55.938		44.051	104.05		143.71	217.09		23.957	192.08		114.7	189.2		216.81	92.617		44.08	21.215		72.086	70.47		120.21	24.391		227.11	127.8		219.6	205.26		51.6	172.69
159.39	195.77		44.722	55.526		43.672	102.95		142.66	216.94		24.401	191.67		115.73	189.75		218.08	91.028		44.4	21.753		72.051	71.25		120.22	24.829		226.34	127.3		219.19	205.11		51.07	173.46
160.64	195.12		45.206	55.398		43.36	102.12		141.75	216.68		24.864	191.32		116.81	190.06		218.9	89.459		44.68	22.237		72.124	71.95		120	25.586		225.29	126.78		218.76	204.08		50.91	174.19
161.86	194.26		45.941	55.055		42.982	101.21		140.64	216.43		25.235	191.01		118.01	190.33		219.34	87.686		45.12	22.468		72.061	72.5		120.2	26.267		224.63	126.55		218.68	203.79		50.51	174.96
163.11	193.09		46.499	54.731		42.547	100.46		139.7	216.18		25.655	190.52		119.21	190.38		219.82	86.035		45.66	22.985		72.024	73.41		120.31	26.991		224.03	126.22		218.7	203.6		50.29	175.64
163.98	191.88		46.932	54.399		42.24	100.01		138.49	215.93		26.225	189.87		120.24	190.24		219.85	84.6		45.87	23.316		72.21	74.48		120.35	27.576		223.11	125.86		218.31	203.35		50.21	176.41
164.76	190.64		47.378	54.159		41.686	99.296		137.65	215.53		26.614	189.38		121.87	189.74		219.91	83.196		46.29	23.721		72.231	75.45		120.39	28.528		222.51	125.68		217.89	203.11		50.26	176.64
165.85	189.48		47.82	53.852		41.117	98.721		136.55	215.39		26.895	188.87		122.51	189.32		219.65	81.633		46.87	24.365		72.154	76.24		120.65	29.366		222.05	125.43		217.69	202.7		50.13	177.3
166.8	187.95		48.262	53.625		40.563	98.249		135.6	215.32		27.36	188.2		123.09	189.08		219.59	80.265		47.45	25.013		72.425	76.71		120.61	29.866		221.38	125.22		217.48	202.47		50.03	178.02
167.72	186.48		48.867	53.182		39.844	97.855		134.56	215.18		27.83	187.5		123.56	188.44		219.14	78.872		48	25.569		72.608	77.43		120.67	30.739		220.4	124.99		217.13	202.33		50	178.88
168.57	185.33		49.163	52.931		39.19	97.486		133.25	215.13		28.345	186.7		123.98	187.69		218.69	77.559		48.5	25.968		72.948	78.14		120.75	31.49		219.48	124.73		216.73	202.17		50.12	179.71
169.24	184.23		49.544	52.744		38.332	97.087		132.2	215		28.617	186.12		124.51	186.87		218.17	76.149		48.91	26.521		73.256	79.07		120.9	31.976		219.13	124.62		216.37	202		50.29	180.68
169.78	183.28		49.912	52.633		37.353	96.956		130.97	215.13		28.99	185.5		124.88	185.92		217.71	74.737		49.53	27.067		73.542	79.56		121.01	32.45		218.27	124.35		216.07	201.94		50.36	181.41
170.26	182.39		50.466	52.419		36.5	96.745		129.94	215.34		29.201	184.9		125.24	184.79		217.65	73.38		49.88	27.373		74.028	80.19		121.02	33.03		217.51	124.35		215.81	201.66		50.45	182.11
171.13	181.44		50.89	52.272		35.592	96.814		128.86	215.42		29.574	184.3		125.26	183.93		217.2	72.033		50.45	27.779		74.543	80.61		121.33	33.82		217.01	124.27		215.68	201.72		50.7	182.86
172.01	180.57		51.242	52.215		34.836	96.758		127.88	215.62		29.828	183.64		125.29	182.99		216.81	70.441		50.83	28.195		74.798	81.3		121.65	34.636		216.46	124.24		215.44	201.7		50.66	183.59
173.07	179.82		51.629	52		34.004	97.117		126.84	216.02		30.164	182.76		125.13	182.09		216.87	68.951		51.49	28.683		75.543	81.91		121.79	35.13		215.73	124.41		215.08	201.58		50.92	184.23
174.12	179.05		52.078	51.65		33.228	97.444		125.99	216.23		30.449	182.22		125.01	181.2		216.91	67.295		51.81	29.055		76.279	82.64		121.99	35.846		215.2	124.42		214.71	201.68		50.98	184.9
174.94	178.25		52.192	51.491		32.503	97.704		124.96	216.65		30.802	181.35		124.79	180.41		216.69	65.543		52.39	29.359		76.859	83.16		122.19	36.198		214.59	124.53		214.5	201.85		51.22	185.5
175.73	177.15		52.726	51.236		31.815	98.061		124.08	216.95		30.902	180.9					216.31	63.885		53	29.712		77.482	83.77		122.45	36.949		213.65	124.89		214.09	201.98		51.35	186.14
176.85	176.01		52.988	50.761		31.05	98.563		123.12	217.44		31.128	180.14					215.68	62.452		53.42	30.022		78.18	84.25		122.55	37.473		213.06	124.79		213.64	201.99		51.62	186.76
177.66	175.05		53.278	50.308		30.557	99.015		122.1	217.88		31.379	179.55					214.95	61.064		54.24	30.252		79.003	84.71		122.77	37.999		212.38	124.58		213.38	201.97		51.96	187.29
178.79	174.02		53.637	49.861		30.467	99.639		121.38	218.47		31.652	178.83					214.3	59.975		54.56	30.614		79.283	84.99		122.94	38.708		212.28	124.54		212.92	201.93		52.2	187.91
179.63	173.06		54.012	49.372		30.323	100.41		120.56	218.9		31.904	178.46					213.69	58.572		55.02	30.872		79.674	85.2		123.18	39.156		211.78	124.61		212.27	201.75		52.44	188.44
180.2	172.02		54.305	48.928		30.293	101.13		119.48	219.47		32.034	177.83					212.87	57.255		55.5	31.081		80.517	85.54		123.7	39.922		211.2	124.53		211.91	201.61		52.56	188.72
180.74	171.08		54.786	48.58		30.272	101.83		118.76	220.33		32.128	177.5					212.23	56.198		55.54	31.093		81.355	86.02		124.09	40.498		210.73	124.68		211.6	201.58		52.71	189.07
181.45	170.19		54.897	48.211		30.472	102.51		117.83	221.66		32.237	176.94					211.3	55.064		55.71	31.152		82.01	86.39		124.56	40.882		210.1	124.75		211.21	201.53		52.76	189.66
182.28	169.12		55.229	47.644		30.714	103.31		117.22	222.69		32.402	176.25					210.22	53.775		55.92	31.152		82.869	86.94		124.93	41.32		209.66	124.51		210.77	201.58		52.89	190.2
182.97	168.09		55.571	46.984		30.888	104.25		116.81	223.56		32.557	175.3					209.11	52.726		55.9	30.963		83.734	87.27		125.07	41.957		209.06	124.37		210.66	201.45		53.3	190.81
183.29	167.26		55.894	46.449		31.118	104.82		116.54	224.42		32.532	174.29					207.94	52.071		55.93	30.92		84.557	87.76		125.74	42.449		208.51	124.32		210.39	201.23		53.69	191.27
183.92	165.94		56.107	45.73		31.511	105.53		116.47	225.28		32.61	173.32					206.78	51.077		55.89	30.744		84.913	87.9		126.08	42.806		208.06	124.17		210.13	200.87		54.18	191.8
184.32	164.95		56.228	45.141		31.722	106.2		116.65	226.25		32.599	172.28					205.46	49.961		56.11	30.817		86.162	88.18		126.52	43.189		207.35	124.19		209.69	200.58		54.51	192.12
184.85	163.8		56.494	44.275		32.114	106.98		116.8	227.07		32.435	171.48					203.99	48.871		55.98	30.822		87.116	88.53		127.18	43.572		206.65	124.09		209.46	200.48		54.53	192.25
185.44	162.7		56.512	43.416		32.75	107.56		117.03	228.07		32.194	170.69					202.48	48.371		55.97	30.791		87.646	88.54		128.12	44.058		206.3	123.74		209.09	200.3		54.73	192.54
186.04	161.38		56.325	42.758		33.411	108.22		117.52	229.1		31.985	170.06					201.13	48.305		56.04	30.902		88.234	88.56		128.78	44.227		205.62	123.68		208.75	200.17		55	193.03
186.53	160.01		55.988	41.901		34.011	108.73		118.08	230.03		31.877	169.51					199.22	48.474		56.17	30.826		89.214	88.74		129.2	44.479		204.98	123.79		208.48	200.21		55.37	193.53
186.87	158.73		55.786	41.145		34.671	108.98		118.86	230.95		31.757	168.92					197.73	48.853		56.36	30.927		89.927	89.05		129.96	44.66		204.23	123.82		208.01	200		55.9	194.09
187.18	157.52		55.346	40.651		35.41	109.31		119.59	231.69		31.506	168.35					196.32	49.366		56.45	30.913		90.347	89.13		130.72	45.191		203.31	123.89		207.77	200.16		56.4	194.35
187.5	156.32		54.629	40.107		36.291	109.48		120.26	232.44		31.18	167.8					195.02	49.926		56.29	31.15		90.768	89.35		131.17	45.46		202.48	124.12		207.58	200.43		57.02	194.55
187.82	155.25		54.012	39.345		37.135	109.62		121.33	233.09		30.756	167.22					193.31	50.983		56.5	30.8		91.302	89.23		131.85	45.661		201.6	124.45		206.87	200.97		57.65	194.85
188.31	154.3		53.266	38.536		38.011	109.5		122.21	233.37		30.293	166.46					192.1	51.931		56.15	30.896		92.05	89.26		132.52	45.766		200.47	124.91		205.76	201.47		58.48	195.26
188.64	153.41		52.551	38.123		39.013	109.19		123.26	233.49		30.088	165.81					191.12	52.607		56.03	30.966		92.496	89.29		132.8	45.737		199.53	125.74		204.44	201.8		59.26	195.59
189.25	152.37		52.045	37.476		39.881	108.88		124.43	233.4		29.784	165.17					190.27	53.596		56.18	30.899		93.243	89.26		133.47	46.116		198.8	126.7		203.24	202.32		60.24	195.73
190.1	151		51.329	37.172		40.615	108.36		125.37	233.38		29.386	164.56					189.16	54.387		56.06	31.16		93.854	89.27		134.19	46.271		198.62	127.66		202.77	202.4		60.95	195.86
190.71	149.48		50.667	36.851		41.412	107.8		126.54	233.03		28.896	163.87					187.87	55.15		56.41	31.067		94.245	89.26		134.93	46.407		198.64	128.68		202.19	202.74		61.68	196.01
			50.123	36.745		42.235	107.12		127.46	232.51		28.579	163.42					186.72	55.905		57.04	30.936		95.043	89.14		136.16	46.391		198.99	129.76		201.3	203.71		62.52	195.96
			49.508	36.406		42.865	106.52		128.3	232.04		28.228	162.75					185.73	56.889		57.37	30.818		95.994	89.05		136.49	46.435		199.51	130.7		200.43	205.38		63.26	195.88
			48.752	36.452		43.263	105.85		129.11	231.27		27.852	162.11					184.72	57.847		57.86	31.14		96.663	89.06		137.17	46.668		200.15	132.07		200.09	206.48		63.93	195.75
			48.038	36.554		43.908	105.11		129.73	230.35		27.348	161.58					183.54	58.77		58.7	31.262		97.634	88.95		138.24	46.631		200.88	133.07		200	207.82		64.72	195.54
			47.492	36.656		44.299	104.32		130.42	229.3		26.797	161.07					182.59	59.677		59.47	31.049		98.056	88.86		138.98	46.783		201.75	133.73		200.17	209.17		65.64	195.25
			46.53	37.074		44.817	103.49		130.8	228.28		26.405	160.64					181.57	61.05		60.5	31.162		98.749	88.85		139.44	46.729		202.52	134.06		200.46	210.3		66.25	194.93
			45.879	37.227		45.158	102.7		131.15	227.04		26.096	160.18					180.75	62.681		61.3	31.433		99.444	88.85		140.23	46.807		203.3	134.24		201.16	211.37		66.54	194.95
			45.187	37.499		45.422	101.72		131.42	225.83		25.717	159.97					180.17	64.38		61.91	31.372		100.17	88.75		140.62	46.924		204.12	134.37		201.74	212.11		67.28	194.62
			44.469	37.998		45.777	100.79		131.5	224.65		25.335	159.75					180	65.914		62.46	31.471		100.72	88.59		141.35	46.819		205.03	134.47		202.49	212.7		67.56	194.42
			43.881	38.267		46.208	99.903		131.47	223.6		24.878	159.22					180.16	67.745		63.17	31.818		101.45	88.55		141.69	47.064		206.25	134.31		203.4	213.1		68.13	193.9
			43.498	38.989		46.552	98.917		131.26	222.51		24.567	158.82					180.57	69.08		64.12	31.915		102.04	88.44		142.55	46.68		207.1	133.89		204.33	213.29		68.67	193.6
			43.098	39.577		46.839	98.073		130.88	221.27		24.269	158.59					181.07	70.391		64.95	32.03		102.48	88.53		142.37	46.863		208.11	133.35		205.46	213.31		69.1	193.16
			42.909	40.265		47.06	97.214		130.37	220.19		23.881	158.16					181.69	71.742		66.37	32.136		103.21	88.37					208.89	132.47		206.72	212.94		69.48	192.69
			42.455	41.021		47.033	96.262		129.79	219.18		23.367	157.63					182.41	73.136		66.89	32.5		104.03	88.22					209.59	131.76		208	212.34		69.63	192.12
			42.332	41.656		46.871	95.439		129.12	218.28		22.784	157.07					183.53	74.736		67.34	32.467		104.57	88.06					210.07	130.92					69.93	191.54
			42.195	42.337		46.56	94.519		128.48	217.38		22.109	156.59					184.98	76.041		68.14	32.798		105.42	87.95					210.36	130.13					70.13	191.05
			42.276	42.912		46.14	93.716		127.53	216.66		21.389	156.15					186.44	77.12		69.16	32.817		106.15	87.75					210.62	129.08					70.22	190.58
			42.163	43.701		45.641	93.128		126.57	216		20.832	155.94					187.88	77.82		69.46	32.93		106.6	87.42					210.48	127.87					70.36	189.82
			42.174	44.399		44.972	92.306		125.66	215.54		20.374	155.66					188.99	78.283		70.21	33.208		107.05	87.16					210.34	126.61					70.42	189.24
			42.37	45.157		44.204	91.621		124.98	215.04		19.75	155.15					190.14	78.87		71.08	33.361		107.63	86.78					209.7	125.63					70.45	188.51
			42.562	45.875		43.574	91.277		123.82	214.59		19.153	154.73					191.45	79.395		71.71	33.287		108.43	86.5					208.97	124.98					70.5	187.82
			42.832	46.597		42.673	90.865		122.84	214.13		18.762	154.38					192.77	79.969		72.46	33.42		109.02	86.18					208.22	124.22					70.41	187.26
			43.244	47.444		42.023	90.6		121.57	213.98		18.205	154.01					194.17	80.168		73.28	33.491		109.88	85.77					207.37	123.58					70.23	186.65
			43.657	48.108		41.163	90.393		120.55	213.66		17.627	153.59					195.11	80.466		74.62	33.834		110.18	85.54					206.01	123.2					70.03	186.03
			43.941	48.558		40.377	90.294		119.06	214.01		17.28	153.19					196.29	80.884		75.25	33.973		110.45	85.25					204.78	122.88					69.91	185.58
			44.43	48.97		39.642	90.265		117.81	214.34		16.621	152.67					197.62	81.431		75.84	34.004		111.04	84.99					203.51	122.59					69.82	185.03
			44.883	49.258		38.885	90.236					16.094	152.42					199.21	82.276		76.66	34.086		111.53	84.95					202.39	122.51					69.65	184.49
			45.246	49.559		38.265	90.524					15.54	152.03					200.86	82.77		77.37	34.347		112.02	84.73					201.65	122.64					69.45	183.98
			45.747	49.954		37.572	90.835					15.046	151.62					202.57	82.698		78.16	34.276		112.82	84.29					200.3	123.17					69.22	183.3
			46.497	50.185								14.811	151.43					204.34	82.658		78.95	34.311		113.67	83.83					199.2	123.79					68.69	182.5
			47.175	50.541								14.537	151.2					205.88	81.705		79.45	34.452		114.03	83.64					198.41	124.3					68.15	181.64
			47.98	50.783								14.095	150.9					207.49	80.302		80.14	34.851		114.82	83.1					197.41	125.18
			49.056	50.803								13.786	150.6					208.51	78.97		80.66	34.764		115.47	82.91					197.02	126.07
			49.717	50.608								13.206	150.57					209.19	77.521		81.72	34.953		116.2	82.46					196.51	127.12
			50.59	50.266								12.941	150.4					209.93	76.322		82.43	35.2		116.6	82.11					196.15	128.21
			51.271	49.749								12.516	150.13					210.49	75.054		83.73	35.593		117.03	81.79					195.99	129.05
			51.587	49.361								12.127	150					211.12	73.83		84.95	35.528		117.32	81.62					195.91	130.04
			52.134	48.772														212.13	72.501		85.74	35.624		117.77	81.5					196.1	131.08
			52.463	48.249														213.11	71.244		86.11	35.515		118.2	81.43					196.63	132.35
			52.824	47.893														214.16	69.903		86.43	35.587		118.66	81.35					197.3	133.27
			53.314	47.162														215.06	68.445		87.11	35.303		119.25	80.92					198.12	134.12
			53.737	46.537														215.88	66.562		87.45	35.351		120.06	80.4					199.08	134.55
			54.059	45.741														216.19	64.738		87.87	35.317		120.66	79.99					199.89	134.65
			54.215	45.03														216.48	63.366		88.39	35.184		121.24	79.61					201.05	134.69
			54.578	44.063														216.86	61.733					121.82	79.06					202.47	134.5
			54.769	43.382														216.78	59.843					122.49	78.86					203.55	133.92
			55.065	42.48														216.37	57.832					122.86	78.62					204.18	133.25
			54.958	41.739														215.74	56.337					123.56	78.33					204.55	132.74
			54.89	40.762														214.86	55.047					124.24	78.19					204.87	131.9
			54.594	39.948														213.95	53.6					124.55	77.87					205.18	130.92
			54.237	39.354														212.88	52.442					125.13	77.33					205.29	129.64
			53.851	38.944														211.86	51.533					125.39	76.98					205.09	128.39
			53.599	38.515														210.61	50.513					125.96	76.87					204.79	127.11
			53.465	37.937														209.47	49.268					126.31	76.34					204.34	126.09
			52.987	37.106														208.01	48.205					126.68	76.07					203.66	125.16
			52.553	36.537														206.36	47.002					126.89	75.9					202.96	123.96
			52.099	35.897														204.66	45.014					127.08	75.48					202.06	122.93
			51.665	35.589														203.16	43.782					127.54	75.15					201.18	122.04
			51.3	35.121														201.83	43.046					128.05	74.8					200.28	121.43
			50.903	34.809														200.56	42.257					128.41	74.55					199.18	120.82
			50.59	34.312														199.11	40.989					128.92	74.17					198.11	120.34
			50.177	33.812														197.33	39.293					129.25	73.79					196.87	120
			49.702	33.421														195.82	37.516					129.66	73.51					195.58	120.04
			49.133	33.084																				130.63	72.99					194.84	120.08
			48.333	32.586																				131.08	72.61					193.82	120.2
			47.968	32.54																				131.73	72.49					192.79	120.43
			47.359	32.19																				132.1	72.37					191.96	120.55
			46.859	31.77																				132.48	71.74					190.73	120.77
			46.255	31.301																				132.89	71.25					189.78	121.13
			45.785	30.922																				133.62	70.93					188.69	121.4
			45.694	30.577																				134.08	70.6					187.55	121.69
			45.174	30.062																				134.34	70.4					186.4	122.08
			44.788	29.778																				134.45	70.25					185.44	122.39
			44.456	29.501																				135.12	69.94					184.47	122.81
			44.007	29.086																				135.45	69.89					183.47	123.31
			43.413	28.963																				136.03	69.65					182.75	123.46
			42.642	28.666																				137.08	69.33					181.57	124.03
			42.109	28.437																				137.04	69.38					180.58	124.61
			41.462	28.311																				137.71	68.77					179.67	125.07
			40.569	28.172																				138.24	68.42					178.68	125.64
			40.145	28.136																				138.66	68.01					177.84	125.94
			39.624	27.938																				138.71	67.64					177.17	126.33
			39.152	27.714																				139.2	67.08					176.46	126.62
			38.568	27.73																				140.06	66.75					175.71	126.99
			37.993	27.8																				140.49	66.85					174.92	127.36
			37.036	27.39																				140.92	66.73					174.09	128.03
			36.549	27.187																				141.31	66.34					173.36	128.46
			35.663	27.08																				141.7	66.31					172.65	129
			34.979	27.165																				142.28	66.01					171.69	129.64
			34.457	27.028																				142.57	65.76					170.92	130.23
			33.946	26.834																				142.85	65.7					170.09	130.56
			33.806	26.69																				143.11	65.44					169.53	130.84
			33.363	26.663																				143.94	65.1					168.98	131.19
			32.99	26.535																				144.75	64.73					168.33	131.5
			32.41	26.559																				145.01	64.38					167.39	131.84
			32.097	26.28																										166.68	132.2
			31.568	26.255																										165.85	132.51
			31.313	26.18																										164.81	132.74
			30.909	25.953																										163.7	132.86
			30.468	25.795																										162.45	133.12
			29.787	25.79																										161.56	133.1
			28.861	25.693																										160.58	132.96
			28.418	25.532																										159.76	133.11
			27.742	25.483																										159.01	133.17
			27.213	25.469																										158.33	133.29
			26.931	25.369																										157.47	133.43
			26.812	25.323																										156.49	133.81
			26.291	25.079																										155.46	134.03
			25.896	24.747																										154.71	134.1
			25.322	24.646																										153.36	134.32
			24.783	24.531																										152.24	134.22
			24.081	24.604																										151.23	134.28
			23.899	24.425																										150.21	134.25
			23.248	24.535																										149.02	134.58
			22.461	24.502																										148.4	134.79
			21.59	24.237																										147.68	134.92
			21.084	24.364																										146.76	135.25
			20.8	24.448																										146.25	135.51
			20.017	24.312																										145.24	135.75
			19.564	24.129																										144.23	135.99
			19.135	24.097																										143.16	136.18
			18.882	23.838																										142.14	136.3
			18.582	23.773																										141.08	136.38
			18.268	23.571																										139.83	136.33
			17.74	23.495																										139.13	136.23
			17.569	23.446																										138.25	136.27
			17.564	23.637																										137.32	136.36
			17.299	23.576																										136.14	136.09
			17.225	23.548																										135.28	136
			17.575	23.597																										134.47	136.1
			17.866	23.685																										133.55	136.07
			17.592	23.706																										132.25	135.79
			17.059	23.901																										131.1	135.64
			17.561	23.833																										130.06	135.49
			17.615	23.936																										129.12	135.28
			17.378	23.915																										128.22	135.1
			17.503	23.914																										127.35	134.61
			17.621	23.845																										126.63	134.22
			17.628	23.898																										125.79	133.93
			17.762	23.918																										124.95	133.69
			17.23	23.862																										124.1	133.2
			16.84	23.916																										123.29	132.91
			16.692	24.007																										122.63	132.59
			16.16	23.957																										121.73	132.4
			15.706	24.023																										120.87	132.23
			15.102	24.099																										119.87	131.71
			14.488	24.406																										119.02	131.14
			14.164	24.657																										118.03	130.73
			13.161	24.779																										117.08	130.3
			13.205	24.99																										116.24	130.13
																														115.31	130.05
																														114.49	129.93
																														113.77	129.67
																														112.96	129.33
																														111.96	129.16
																														111.22	128.8
																														110.73	128.45
																														110.19	128.12
																														109.5	127.74
																														108.76	127.44
																														108.08	127.3
																														107.21	127.17
																														106.61	126.88
																														106.01	126.76
																														105.6	126.7
																														104.79	126.62
																														104.02	126.25
																														103.36	125.87
																														102.86	125.76
																														102.06	125.53
																														101.38	125.36
																														100.75	125.17
																														100.22	124.91
																														99.42	124.59
																														98.76	124.24
																														97.98	124.04
																														97.24	123.96
																														96.44	123.76
																														95.65	123.59
																														94.97	123.46
																														94.18	123.39
																														93.39	123.24
																														93.04	122.95
																														92.67	122.87
																														91.95	122.59
																														91.11	122.52
																														90.53	122.37
																														89.8	122.12
																														88.91	122.17
																														87.96	122.24
																														87.31	121.95
																														86.59	121.95
																														86.02	121.97
																														85.7	121.82
																														85.28	122.09
																														84.35	122.42
																														83.63	122.51
																														83.35	122.47
																														82.44	122.6
																														81.81	122.74
																														81.24	122.79
																														80.5	123.06
																														80	123.26

## Sheet: Fig. 3C
Attractant		Control
Single-cell CWbias		Single-cell CWbias
0		0
0		0
0		0.1556
0.4765		0.4833
0.5915		0.2464
0.4803		0.3023
0		0.1786
0.25		0.092
0		0.4444
0.1429		0.4419
0		0.2642
0		0.5556
0		0.5
0		0.5191
0.3699		0.38
0		0.75
0		0.375
0		0.38
0		0.3611
0		0.3

## Sheet: Fig. 3D
Attractant		Control
Single-cell Reversal freq		Single-cell Reversal freq
0		0
0		0
0		1.0273
0.0545		2.3791
0.8651		1.3493
1.0936		1.0763
0		0.8219
1.5587		1.0636
0		0.8529
0.5948		1.0763
0		1.7727
0		1.7386
0		2.8853
0		2.1697
1.1038		0.9225
0		1.2915
0		3.0135
0		0.9225
0		2.2791
0		2.2127
