# Supplementary material for: Asymmetric random walks reveal that the chemotaxis network modulates flagellar rotational bias in Helicobacter pylori
Source: eLife. 2021 Jan 25;10:e63936. doi: 10.7554/eLife.63936 (PMC7834020; doi:10.7554/eLife.63936)
Supplement: Figure 4—source data 1. [file elife-63936-fig4-data1.xlsx]

## Sheet: Fig. 4A-left
Temperature (°C)	pusher_speeds (μm/s)	Standard deviation	puller_speeds (μm/s)	Standard deviation
25	26.1777	7.9824	14.289	7.7503
28	32.9066	8.675	19.8715	9.5421
31	43.4178	10.3174	24.0632	10.4338
34	46.1683	12.1876	24.6354	10.3874
37	52.9802	13.9578	28.8357	11.5499
40	50.444	11.83	28.2992	10.9381
43	52.9634	11.3549	31.7385	12.3561

## Sheet: Fig. 4A-right
Temperature (°C)	Single-cell pusher/puller speeds ratio
25	1.4672
25	1.50265
25	2.25508
25	1.0896
25	1.17388
25	3.17374
25	2.86216
25	1.01738
25	2.49247
25	1.66708
25	1.87649
25	2.00094
25	1.06396
25	1.29111
25	1.92575
25	0.880138
25	2.22712
25	2.76311
25	1.27755
25	1.48426
25	2.02612
25	1.47099
25	1.53368
25	3.39183
25	2.12034
25	1.46653
25	1.0268
25	1.59634
25	1.2278
25	2.04658
25	2.16335
25	2.45261
25	1.10346
25	1.73127
25	1.52919
25	1.21862
25	1.14185
25	3.40226
25	1.00866
25	1.08967
25	1.11749
25	1.31553
25	1.09599
25	1.60602
25	1.09463
25	2.48867
25	1.64519
25	1.58055
25	1.32613
25	1
25	1.56117
25	1.2479
25	2.12432
25	1.74
25	1.31029
25	1.39115
25	1.54332
25	1.95764
25	2.03262
25	2.37581
25	1.58542
25	2.41304
25	2.12116
25	1.50714
28	1.77551
28	1.76606
28	3.92034
28	1
28	1.51705
28	1.85871
28	1.22366
28	1.77636
28	1.70937
28	1.46113
28	1.2277
28	1.92477
28	1.01577
28	1.88987
28	1.81089
28	2.43291
28	1.55918
28	1.4398
28	2.78699
28	1.47006
28	2.02055
28	1.98226
28	1.42861
28	1.09999
28	1.2696
28	4.1382
28	1.29634
28	1.70666
28	1.10509
28	1.68704
28	1.38855
28	2.13032
28	1.0765
28	1.97652
28	3.48959
28	3.31534
28	4.22528
28	2.63838
28	1.0703
28	1.25114
28	1.43368
28	1.67884
28	1.63323
28	1.47593
28	1.3446
31	1.87887
31	4.6781
31	3.41913
31	1.22524
31	1.44813
31	1.34439
31	1.19228
31	1.53003
31	3.20121
31	1.05871
31	1.18734
31	1.78619
31	2.55591
31	1.89912
31	1.58847
31	1.15081
31	1.7431
31	5.14695
31	1.78108
31	2.13079
31	0.770993
31	1.62917
31	1.38411
31	1.5833
31	1.25975
31	1.8628
31	1.0158
31	1.51226
31	1.36227
31	1.31824
31	1.44457
31	1.46027
31	1.51216
31	1.12031
31	1.62098
31	1.20923
31	1.1648
31	1.21329
31	1.36227
31	1.31824
31	1.44457
31	1.46027
31	1.51216
31	1.12031
31	1.62098
31	1.20923
31	1.1648
31	1.21329
31	1.98522
31	1.95273
31	1.76429
31	1.89787
31	1.29744
31	1.54306
31	2.26523
31	2.45151
31	2.12043
31	1.18046
31	2.11222
31	1.61262
31	3.6953
31	4.75794
31	2.31612
31	2.20372
31	3.45746
31	1.19073
31	2.82574
31	2.15348
31	2.14017
31	1.71469
31	1.46206
31	1.64766
31	1.89273
31	2.80019
31	1.64943
31	2.46572
31	1.14038
31	1.28574
31	2.41065
31	1.23954
31	2.09282
31	1.41664
31	1.48341
31	1.66598
31	1.37187
31	2.01399
31	1.54824
31	2.00884
31	1.12202
31	2.62728
31	1.97355
34	1.23261
34	1.72557
34	1.37242
34	1.03428
34	1.40966
34	1.21862
34	1.00804
34	1.2191
34	1
34	2.12124
34	1.50712
34	2.66957
34	1.18051
34	1.15088
34	1.35236
34	2.15532
34	1.00201
34	1.45673
34	1.29303
34	1.27232
34	2.16281
34	2.38384
34	1.27614
34	1.29231
34	1.37928
34	2.73851
34	2.97836
34	1.77
34	1.33741
34	3.20125
34	2.12387
34	1.37044
34	1.38369
34	2.59151
34	1.17047
34	1.14966
34	1.87504
34	2.2427
34	4.07039
34	2.54673
34	1.64615
34	2.20561
34	2.10061
34	1.72208
34	2.05352
34	2.80039
37	2.00402
37	1.93337
37	1.4385
37	3.30678
37	1.17169
37	1.7389
37	2.00492
37	1.13296
37	1.44544
37	2.7417
37	1.33208
37	1.76935
37	1.49529
37	0.790734
37	1.61921
37	1.48101
37	1.56116
37	2.1002
37	1.38399
37	0.908796
37	1.8615
37	1.00833
37	1.99431
37	1.56137
37	1.47212
37	2.69278
37	2.54002
37	1.84237
37	1.70843
37	1.31689
37	1.51503
37	1.47894
37	2.419
37	1.59485
37	1.22775
37	1.93888
37	1.98807
37	1.60144
37	1.70858
37	1.36666
37	2.27996
37	2.60141
37	2.73955
37	1.60613
37	1.53046
37	1.88674
37	2.02903
37	1.5687
37	1.34629
37	1.14178
37	3.02412
37	1.12305
37	1.3011
37	1.7909
37	1.38799
37	1.37369
37	1.32998
37	3.95185
37	3.54447
37	1.74159
37	1.72027
37	1.33778
37	2.52651
37	3.91206
37	0.838296
37	1.53423
37	1.92027
37	1.14573
37	1.43466
37	2.57857
37	1.39659
37	2.75007
37	1.07481
37	0.777294
37	2.02728
37	2.02677
37	1.18043
37	1.66548
37	1.33373
37	1.184
37	1.58643
37	1.45834
37	1.64601
37	1.29182
37	1.39062
37	2.18293
37	2.08017
37	1.35122
37	1.46356
37	1.17443
37	1.11935
37	3.11728
37	1.71746
37	1.70719
37	1.42659
37	1.1513
37	1.26442
37	1.66663
37	1.8772
37	0.959162
37	1.52597
37	1.12571
37	1.69685
37	1.9716
37	1.33391
37	1.75418
37	2.86648
37	1.88888
37	1.73089
37	1.81571
37	1.21752
37	1.7315
37	2.22682
37	1.59669
37	2.66364
37	1.83493
37	1.24847
37	1.93808
37	1.7908
37	1.45832
37	1.43222
37	1.59228
37	1.20728
37	1.70334
37	1.43607
37	1.38527
37	2.68766
37	1.23462
37	1.64635
37	1.7544
37	1.77959
37	1.41301
37	0.891939
37	1.42253
37	1.54422
37	1.35935
37	1.39264
37	1.48224
37	1.27784
37	1.35558
37	1.83293
37	2.12374
37	1.55819
37	1.14347
37	1.85264
37	1.47606
37	3.51825
37	2.07172
37	0.797189
37	1.67622
37	0.758655
37	1.25492
37	0.956188
37	1.47655
37	1.83259
37	1.72981
37	1.72809
37	1.55243
37	1.27334
37	1.25281
37	2.86555
37	1.695
37	3.94067
37	1.36633
37	1.82682
37	2.09232
37	1.9804
37	1.54234
37	1.45492
37	1.03611
37	1.41346
37	1.14233
37	2.2754
37	1.57708
37	2.40979
37	1.96213
37	1.28497
37	1.53811
37	2.47802
37	2.39356
37	1.51329
37	1.74496
37	1.1918
37	1.56387
37	2.14112
37	1.17152
37	1.69932
37	1.10594
37	1.43685
37	1.04238
37	1.42849
37	2.08732
37	1.84474
37	1.12755
37	1.89022
37	1.99419
37	2.39327
37	1.95521
37	1.08374
37	1.24302
37	1.32786
37	1.228
37	1.71297
37	1.85982
37	1.40183
37	1.36215
37	1.34104
37	1.87817
37	1.64682
37	1.59657
37	1.7487
37	1.56414
37	1.4057
37	3.98184
37	2.7148
37	1.56307
37	1.59711
37	1.06356
37	1.21452
37	5.6912
37	2.27469
37	1.19801
37	1.69535
37	1.56865
37	2.08694
37	2.26838
37	1.52399
37	2.21444
37	1.37893
37	2.31894
37	1.48025
37	2.20192
37	2.25661
37	1.51514
37	1.22862
37	1.36482
37	1.65531
37	1.17638
37	2.51003
37	1.58871
37	1.50055
37	2.15628
37	1.33462
37	1.65423
37	1.55792
37	1.86614
37	1.02256
37	1.48728
37	1.10872
37	1.23341
40	1.54557
40	2.12784
40	1.05299
40	1.53714
40	1.27289
40	1.43661
40	1.75722
40	2.43969
40	1.98001
40	2.04109
40	1.75243
40	2.79352
40	1.78169
40	1.72435
40	1.32993
40	1.22853
40	1.77644
40	1.50122
40	1.64436
40	1.93598
40	1.20125
40	2.15562
40	1.50309
40	2.26719
40	1.97303
40	1.99164
40	1.99965
40	1.90765
40	2.24146
40	2.14432
40	2.32794
40	2.38071
40	1.33552
40	1.37352
40	1.35615
40	3.36925
40	1.98833
40	1.18534
40	1.16853
40	1.59313
40	1.47784
40	2.30003
40	1.24929
40	1.48549
40	1.48942
40	1.2882
40	4.98538
40	2.60999
40	1.18818
40	1.67101
40	1.23858
40	1.94407
40	2.61381
40	1.39913
40	2.02126
40	1.87925
40	2.2401
40	2.60862
40	2.70784
40	1.34839
40	1.69616
43	3.37759
43	2.48922
43	2.46287
43	1.73576
43	2.54996
43	1.28893
43	3.94451
43	1.10233
43	1.09471
43	1.00397
43	1.03388
43	3.01231
43	0.977631
43	1.37093
43	2.70807
43	1.08253
43	1.40174
43	1.78698
43	1.88786
43	1.34787
43	1.06496
43	1.00293
43	1.52698
43	1.91009
43	1.20791
43	2.20098
43	1.29922
43	1.28419
43	1.59182
43	1.12793
43	1.26799
43	1.03563
43	1.44656
43	2.45484
43	1.08422
43	1.82486
43	2.35665
43	0.769632
43	1.5574
43	0.966301
43	1.12347
43	1.18346
43	1.33514
43	0.922639
43	3.18037
43	1.06824
43	1.07213
43	1.88428
43	1.35471
43	1.05266
43	0.87172
43	1.36521
43	2.86146
43	1.56887
43	2.36472
43	2.47004
43	1.15294
43	1.68087
43	1.23602
43	1.23834
43	1.28127
43	1.8222
43	3.29397
43	2.42968
43	1.87597

## Sheet: Fig. 4B
Temperature (°C)	CWbias	Standard error	Reversal Frequency (Hz)	Standard error
25	0.1351	0.0237	0.1212	0.0211
28	0.4672	0.0338	0.5792	0.0464
31	0.3635	0.0204	0.8821	0.0551
34	0.3765	0.0212	1.2688	0.0827
37	0.3452	0.0116	1.8887	0.0665
40	0.3293	0.0176	1.7768	0.1
43	0.2666	0.0194	1.2652	0.0999

## Sheet: Fig. 4C
CWbias	Reversal Frequency (Hz)	Standard error
0.025	0.0109	0.0048
0.075	0.9096	0.1503
0.125	1.3076	0.1175
0.175	1.4981	0.1241
0.225	1.6873	0.116
0.275	1.9025	0.1196
0.325	1.9902	0.1152
0.375	2.1621	0.1226
0.425	1.8827	0.137
0.475	2.0104	0.124
0.525	1.9064	0.1657
0.575	1.681	0.1786
0.625	1.5554	0.1996
0.675	1.318	0.1741
0.725	1.2793	0.1682
0.775	1.1652	0.1706
0.825	0.8163	0.2076
0.875	0.5893	0.1313
0.925	0.2182	0
0.975	0	0

## Sheet: Fig. 4D
Temperature (°C)	K/C
28	3.9493
31	3.6132
34	3.1954
37	2.8961
40	2.629
43	2.441
