# Supplementary material for: Asymmetric random walks reveal that the chemotaxis network modulates flagellar rotational bias in Helicobacter pylori
Source: eLife. 2021 Jan 25;10:e63936. doi: 10.7554/eLife.63936 (PMC7834020; doi:10.7554/eLife.63936)
Supplement: Figure 5—source data 1. [file elife-63936-fig5-data1.xlsx]

## Sheet: Fig. 5A
Single-segment wait-time (sec)
0.24444
0.44444
0.6
0.42222
0.6
0.42222
0.22222
0.17778
0.48889
0.13333
0.2
0.55556
0.77778
1.0444
0.35556
0.17778
0.24444
0.13333
0.31111
0.26667
0.35556
0.13333
0.31111
0.2
0.68889
0.46667
0.37778
0.8
0.26667
0.31111
0.42222
0.48889
0.75556
0.48889
0.66667
0.95556
0.4
0.28889
0.15556
0.57778
0.2
0.46667
0.44444
0.91111
1.4
0.26667
0.33333
0.22222
0.48889
0.57778
0.24444
0.48889
0.2
0.22222
0.2
0.84444
0.17778
0.33333
1.4889
0.24444
0.24444
0.066667
0.15556
0.17778
0.31111
0.13333
0.46667
0.4
0.24444
0.33333
0.46667
0.28889
0.11111
0.13333
0.11111
0.24444
0.15556
0.42222
0.15556
0.24444
0.066667
0.066667
0.088889
0.17778
0.64444
0.33333
0.17778
0.53333
0.24444
0.26667
0.11111
0.48889
0.4
0.35556
0.31111
0.28889
0.2
0.24444
0.11111
0.15556
0.15556
0.24444
0.13333
1.0444
0.42222
0.48889
1.4
0.73333
0.35556
0.35556
0.26667
0.33333
0.4
0.48889
0.31111
0.22222
0.2
0.71111
0.48889
0.33333
1.0444
0.88889
0.2
0.64444
0.28889
0.088889
0.24444
0.28889
0.2
0.28889
0.17778
0.15556
0.17778
0.2
0.15556
0.15556
0.24444
0.51111
0.53333
0.31111
0.48889
0.17778
0.37778
0.2
0.55556
0.53333
1.2222
0.31111
0.28889
0.51111
0.35556
0.35556
0.6
0.15556
0.31111
0.35556
0.17778
0.13333
0.17778
0.35556
1.2222
1.5556
0.37778
0.17778
0.15556
0.35556
0.26667
0.42222
0.4
0.46667
0.15556
0.37778
1
0.82222
1.1111
1.4889
0.68889
0.84444
0.77778
0.28889
0.35556
0.66667
0.22222
0.26667
0.24444
0.31111
0.51111
0.42222
1.4889
0.28889
0.17778
0.31111
0.15556
0.42222
0.24444
0.28889
0.4
0.28889
0.42222
0.13333
0.11111
0.62222
0.13333
0.46667
0.42222
0.35556
0.48889
0.22222
0.24444
0.24444
0.24444
0.62222
0.64444
0.17778
0.8
0.13333
0.55556
0.35556
0.066667
0.62222
0.26667
0.44444
0.33333
1.0889
0.44444
1.8444
0.93333
0.33333
0.28889
0.26667
0.6
0.13333
0.6
0.64444
0.71111
0.22222
0.17778
0.2
0.13333
0.28889
0.68889
1.6444
0.31111
0.13333
0.4
0.46667
0.8
0.44444
0.46667
1.0444
1.1111
0.24444
0.51111
0.93333
1.0444
0.82222
0.57778
0.22222
1
0.26667
0.24444
0.6
1.3333
0.22222
0.17778
0.55556
0.31111
0.33333
0.26667
0.4
0.11111
0.68889
0.26667
0.24444
0.31111
0.2
0.2
1.2
0.2
0.37778
0.31111
0.22222
0.31111
0.6
0.62222
0.44444
0.2
1.4444
1.0222
0.33333
0.46667
0.31111
0.48889
0.33333
0.24444
0.28889
0.46667
0.75556
0.68889
0.77778
0.28889
1.9333
0.48889
1.2
0.26667
0.11111
0.15556
0.93333
0.4
0.51111
0.46667
1.1556
0.26667
0.66667
0.13333
0.088889
0.75556
0.55556
0.53333
0.55556
0.46667
0.84444
0.088889
0.11111
0.31111
0.22222
0.4
0.088889
0.24444
0.22222
0.44444
0.35556
0.2
0.44444
0.51111
0.17778
0.2
0.4
0.26667
0.22222
0.66667
0.17778
0.11111
0.15556
0.15556
0.22222
0.15556
1.5333
0.53333
0.48889
0.44444
0.28889
1.0222
0.31111
0.35556
0.4
0.31111
0.24444
0.13333
0.64444
0.91111
0.33333
0.15556
0.22222
0.51111
0.24444
0.15556
0.51111
0.2
0.066667
0.15556
0.26667
0.17778
0.6
2.1111
0.33333
0.2
0.28889
0.22222
0.13333
0.35556
0.11111
0.066667
0.17778
0.24444
0.13333
0.46667
0.11111
0.35556
0.2
0.31111
0.24444
0.088889
0.17778
0.11111
0.31111
0.51111
0.13333
0.15556
0.15556
0.26667
0.31111
0.088889
0.51111
0.15556
0.13333
0.37778
0.31111
0.42222
0.44444
0.15556
0.17778
0.33333
0.17778
0.53333
0.13333
0.35556
0.13333
0.17778
0.22222
0.13333
0.066667
0.066667
0.4
0.2
0.24444
0.088889
0.2
0.22222
0.28889
0.13333
0.2
0.26667
0.11111
0.13333
0.13333
0.11111
0.17778
0.15556
0.33333
0.24444
0.2
0.22222
0.33333
0.28889
0.42222
0.24444
0.66667
0.6
0.11111
0.066667
0.28889
0.15556
0.11111
0.13333
0.8
0.088889
0.17778
0.37778
0.44444
0.66667
0.31111
0.15556
0.44444
0.24444
0.44444
0.066667
0.088889
0.15556
0.17778
0.28889
0.46667
0.26667
0.13333
0.6
0.28889
0.46667
0.15556
0.28889
0.22222
0.86667
0.4
0.17778
0.53333
0.22222
0.17778
0.6
0.35556
0.31111
0.31111
0.28889
0.17778
0.17778
0.22222
0.15556
0.17778
0.13333
0.26667
0.26667
0.4
0.24444
0.088889
0.31111
0.35556
0.28889
0.28889
0.11111
0.24444
0.15556
0.11111
0.24444
0.4
0.86667
0.24444
0.066667

## Sheet: Fig. 5C
a	D (μm^2/s)	Standard deviation
0	18.0654	0.5049
0.25	35.743	1.0669
0.5	68.3857	2.25
0.75	123.467	3.9989
1	199.141	5.2608
1.25	304.437	8.0756
1.5	412.587	10.219
1.75	509.807	10.2354
2	685.77	14.5541

## Sheet: Fig. 5D
	CWbias	0.14	0.25	0.39	0.48	0.61	0.75	0.86
a		Diffusivity (μm^2/s)
0	Diffusivity (μm^2/s)	188.689	100.527	28.5738	11.4863	26.9991	98.064	176.955
0.25		299.559	185.629	64.9357	21.8868	20.0181	81.5664	165.841
0.5		449.62	299.156	114.262	43.6854	18.3635	66.6009	157.052
0.75		656.86	438.821	178.856	82.2757	24.7836	52.2813	141.853
1		898.657	581.801	267.202	120.716	37.3068	42.0118	122.533
